# Supplementary material for: Contribution of dihydrouridine in folding of the D-arm in tRNA
Source: Royal Society of Chemistry journal article supplement (doi:10.1039/c5ob00164a), 2015-01-01
Supplement: c5ob00164a1.pdf [file c5ob00164a1.pdf]

## Contribution of Dihydrouridine in Folding of the D-arm in tRNA.

N. Dyubankova,<sup>a</sup> E. Sochacka,<sup>b</sup> K. Kraszewska,<sup>c</sup> B. Nawrot,<sup>c</sup> P. Herdewijn<sup>d</sup> and E.

Lescrinier<sup>\*,a</sup>

<sup>a</sup> Medicinal Chemistry, Department of Pharmaceutical Sciences, Rega Institute for Medical Research, KU Leuven, Minderbroedersstraat 10, 3000 Leuven, Belgium

<sup>b</sup> Institute of Organic Chemistry, Faculty of Chemistry, Technical University of Lodz, Zeromskiego 116, 90-924 Lodz, Poland

<sup>c</sup> Department of Bioorganic Chemistry, Centre of Molecular and Macromolecular Studies, Polish Academy of Sciences, Sienkiewicza 112, 90-363 Lodz, Poland

### Table of contents:

(1) NMR data

(2) Molecular modelling statistics

(3) Backbone torsion angles for the modified hairpin.

**NMR data:**

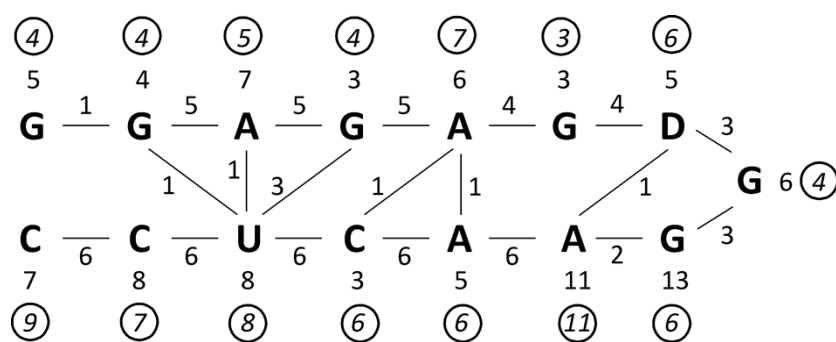

**Figure S1.** Schematic representation of the number of NOE distance restraints used in the structure calculations of the modified hairpin grouped as intra- and inter-nucleotide distances.

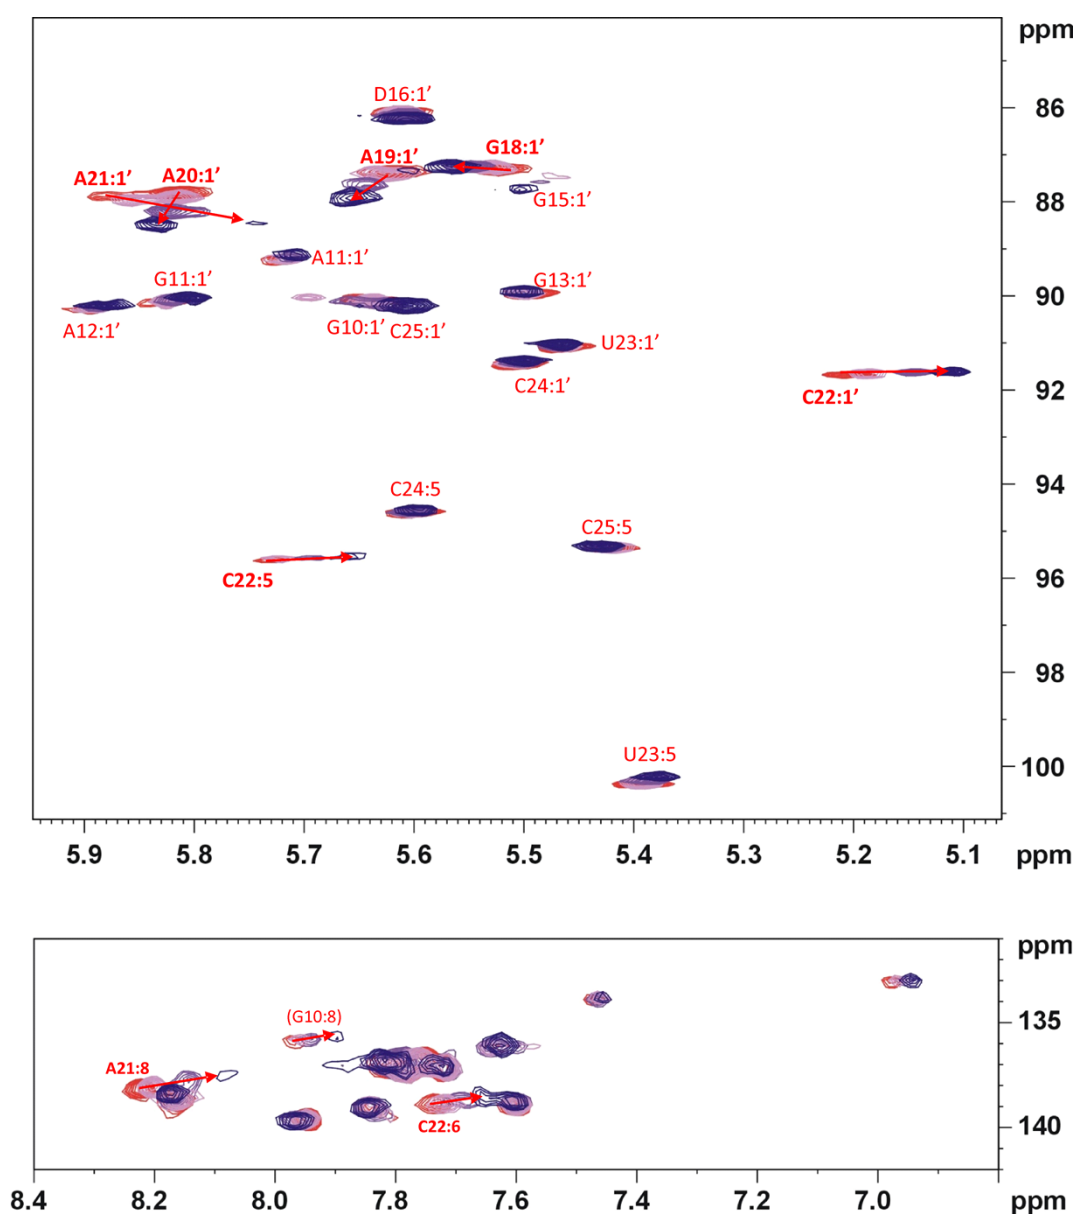

**Figure S2.**  $^1\text{H}$  and  $^{13}\text{C}$  chemical shift changes in the anomeric and aromatic regions of the modified D-arm at increasing  $[\text{Mg}^{2+}]$ .

## Molecular modelling statistics:

**Table S1.** NMR-based molecular modelling statistics for the 10 refined structures of the modified D-loop.

|                                                      |                 |
|------------------------------------------------------|-----------------|
| <b>Averaged total energy (kcal.mol<sup>-1</sup>)</b> | -66164 +/- 1211 |
| <b>Distances</b>                                     | 284             |
| Intra-residual NOE                                   | 87              |
| Inter-residual NOE                                   | 186             |
| Hydrogen bonds                                       | 11              |
| <b>Dihedral angles</b>                               | 54              |
| Backbone                                             | 27              |
| Ring pucker                                          | 27              |
| <b>Restraints violations</b>                         |                 |
| NOE (>5.0 Å)                                         | 0               |
| Angles (> 5°)                                        | 0               |
| <b>RMS deviation</b>                                 |                 |
| For NOE restraints (Å)                               | 0.051 +/- 0.002 |
| For dihedral restraints (°)                          | 0.080 +/- 0.080 |
| <b>RMSD from mean structure (heavy atoms)</b>        | 1.0 +/-0.3      |

## Backbone torsion angles for the modified hairpin:

**Table S2.** Backbone torsion angles for the modified hairpin. <sup>a</sup>

| Residue            | $\alpha$ | $\beta$  | $\gamma$ | $\delta$ | $\epsilon$ | $\zeta$   |
|--------------------|----------|----------|----------|----------|------------|-----------|
| G1                 |          |          | 60 (2)   | 89 (2)   | 216 (6)    | 295 (4)   |
| G2                 | 288 (5)  | 160 (4)  | 70 (2)   | 88 (1)   | 205 (8)    | 273 (4)   |
| A3                 | 277 (3)  | 174 (9)  | 67 (3)   | 87 (1)   | 205 (6)    | 298 (4)   |
| G4                 | 286 (4)  | 185 (6)  | 58 (2)   | 87 (2)   | 189 (7)    | 230 (98)  |
| A5                 | 156 (26) | 172 (52) | 180 (4)  | 93 (2)   | 226 (28)   | 268 (70)  |
| G6                 | 213 (77) | 174 (52) | 118 (57) | 92 (2)   | 187 (7)    | 190 (108) |
| D7                 | 171 (23) | 156 (65) | 176 (6)  | 146 (2)  | 204 (12)   | 163 (73)  |
| G8                 | 139 (61) | 182 (48) | 107 (58) | 94 (3)   | 255 (29)   | 230 (57)  |
| G9                 | 95 (56)  | 209 (24) | 188 (5)  | 99 (5)   | 237 (39)   | 234 (35)  |
| A10                | 104 (26) | 244 (25) | 180 (4)  | 95 (1)   | 207 (9)    | 312 (8)   |
| A11                | 230 (73) | 185 (30) | 107 (50) | 95 (3)   | 201 (6)    | 285 (6)   |
| C12                | 298 (5)  | 183 (9)  | 60 (3)   | 87 (1)   | 215 (6)    | 286 (4)   |
| U13                | 281 (5)  | 175 (6)  | 57 (2)   | 85 (1)   | 206 (3)    | 298 (2)   |
| C14                | 292 (3)  | 169 (4)  | 60 (2)   | 85 (1)   | 203 (5)    | 281 (3)   |
| C15                | 285 (6)  | 184 (8)  | 54 (2)   | 89 (1)   | 216 (6)    | 295 (4)   |
| A-RNA <sup>b</sup> | 292      | 178      | 54       | 82       | 207        | 289       |

<sup>a</sup> Mean values in degrees calculated with Curves+ for the 10 structures. The standard deviation are given between parentheses.

<sup>b</sup> Reference values for canonical RNA structure are *Nucleic Acids in Chemistry and Biology* (Eds.:G. M. Blackburn, M.J. Gait, D. Loakes, D. M. Williams). Oxford University Press. **1996**. Chapter 2.
